# Supplementary material
Source: publisher site journal article supplement (https://www.spandidos-publications.com/6007/downloadSupplementary)

Figure S1. PCA image and PPI network based on STRING. (A) PCA result. (B) PPI network between the 13 ferroptosis-related genes based on STRING. PCA, principal component analysis; PPI, protein-protein interaction; STRING, Search Tool for the Retrieval of Interacting Genes.

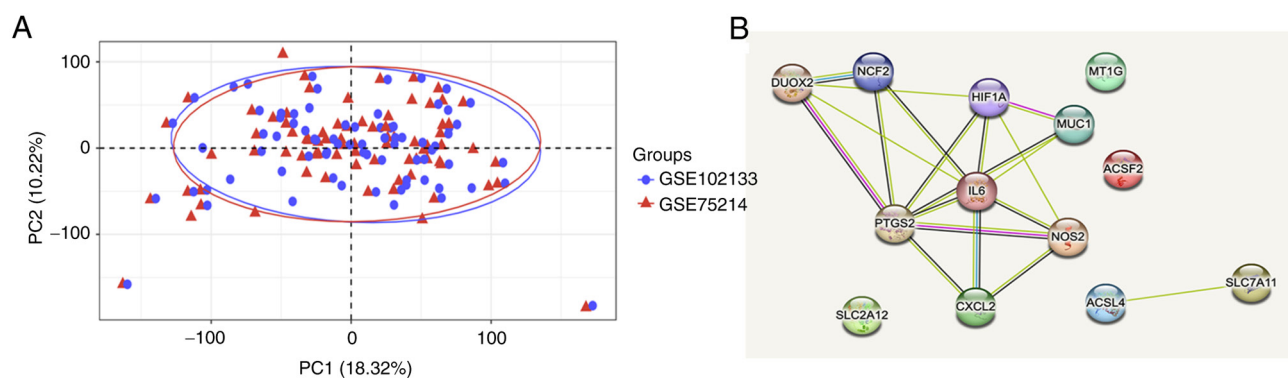

Supplement: Supplementary file 1 [file downloadSupplementary]
